# Supplementary material for: Neutralization Assessments Reveal High Cardiothoracic Ratio and Old Age as Independent Predictors of Low Neutralizing Antibody Titers in Hemodialysis Patients Receiving a Single Dose of COVID-19 Vaccine
Source: MDPI journal article supplement (doi:10.3390/jpm12010068), 2022-01-07
Supplement: s1 [file s1]

**Table S1.** Demographics and clinical characteristics comparisons between enrolled and non-enrolled patients on hemodialysis

|                          | Enrolled ( <i>n</i> = 200) | Non-enrolled ( <i>n</i> = 298) | <i>p</i> value       |
|--------------------------|----------------------------|--------------------------------|----------------------|
| Age, year                | 65.08 ± 12.87              | 66.44 ± 13.55                  | 0.264                |
| Male, n (%)              | 101 (50.5)                 | 163 (54.7)                     | 0.357                |
| Anti-S1 Abs (EU/mL)      | 2.33 (2.01-3.45)           | N/A                            | N/A                  |
| Anti-RBD Abs (EU/mL)     | 2.15 (1.94-2.92)           | N/A                            | N/A                  |
| Hemoglobin (g/dL)        | 10.06 ± 1.16               | 10.06 ± 1.31                   | 0.993                |
| WBC (1000/ $\mu$ L)      | 6.45 ± 2.74                | 6.73 ± 2.96                    | 0.290                |
| Platelet (1000/ $\mu$ L) | 190.93 ± 67.60             | 190.01 ± 69.23                 | 0.884                |
| Albumin (g/dL)           | 4.04 ± 0.37                | 3.97 ± 0.55                    | 0.149                |
| Cholesterol (mg/dL)      | 154.83 ± 35.78             | 152.86 ± 36.66                 | 0.562                |
| Triglyceride (mg/dL)     | 115 (78.75-175.25)         | 122 (81-184)                   | 0.540 <sup>\$</sup>  |
| AST (U/L)                | 17 (13-21)                 | 17 (13-21)                     | 0.996 <sup>\$</sup>  |
| ALT (U/L)                | 14 (10-19)                 | 15 (11-20)                     | 0.036* <sup>\$</sup> |
| Alk-P (U/L)              | 92 (72.25-137.75)          | 92 (71-136)                    | 0.732 <sup>\$</sup>  |
| Total bilirubin (mg/dL)  | 0.4 (0.3-0.4)              | 0.3 (0.3-0.4)                  | 0.398 <sup>\$</sup>  |
| Bun (mg/dL)              | 69.93 ± 21.13              | 71.12 ± 22.03                  | 0.548                |
| Creatinine (mg/dL)       | 9.64 ± 2.50                | 9.22 ± 2.80                    | 0.086                |
| Uric acid (mg/dL)        | 6.22 ± 1.92                | 6.58 ± 1.73                    | 0.032*               |
| Na (meq/L)               | 138.11 ± 3.15              | 138.07 ± 3.25                  | 0.914                |
| K (meq/L)                | 4.77 ± 0.79                | 4.65 ± 0.85                    | 0.140                |
| Ca (mg/dL)               | 9.40 ± 0.81                | 9.28 ± 0.94                    | 0.160                |
| P (mg/dL)                | 5.34 ± 1.57                | 5.21 ± 1.54                    | 0.383                |
| C-reactive protein(mg/L) | 4.30 (1.40-9.42)           | 3.35 (1.20-9.20)               | 0.482 <sup>\$</sup>  |
| Urea reduction rate      | 76 (71-80)                 | 76 (71-80)                     | 0.961 <sup>\$</sup>  |
| Kt/V (Daugirdes)         | 1.65 ± 0.33                | 1.68 ± 0.32                    | 0.421                |
| nPCR (g/kg/day)          | 1.09 ± 0.49                | 1.07 ± 0.29                    | 0.660                |
| TACurea                  | 41.48 ± 13.16              | 42.16 ± 13.46                  | 0.586                |
| Iron ( $\mu$ g/dL)       | 68 (51-90)                 | 65 (50.00-82.25)               | 0.167 <sup>\$</sup>  |
| Ferritin (ng/mL)         | 403.50 (223.00-654.75)     | 437.00(173.00-675.25)          | 0.860 <sup>\$</sup>  |
| TSAT (%)                 | 34.02 ± 13.89              | 32.23 ± 14.91                  | 0.185                |
| Cardiothoracic ratio     | 0.52 ± 0.06                | 0.52 ± 0.07                    | 0.563                |
| Ca × P product           | 50.32 ± 16.42              | 48.38 ± 15.09                  | 0.176                |

Notes: Data are presented as mean ± standard deviation and median (interquartile range). Abbreviations: Abs, antibodies; WBC, white blood cell count; AST, aspartate transaminase; ALT, alanine transaminase; Alk-P, alkaline phosphatase; Bun, blood urea nitrogen; Kt/V, A mathematical formula representing a dose of dialysis; nPCR, normalized protein catabolic rate; N/A, not applicable; TACurea, time average urea concentration; TSAT, transferrin saturation. \*: statistically significant; <sup>\$</sup>: Nonparametric, independent Sample Mann-Whitney U test.

**Table S2.** Demographics and clinical characteristics comparisons between ChAdOx1 (Oxford–AstraZeneca) and mRNA-1273 (Moderna) vaccinated patients on hemodialysis

|                               | ChAdOx1( <i>n</i> = 174) | mRNA-1273 ( <i>n</i> = 26) | <i>p</i> value        |
|-------------------------------|--------------------------|----------------------------|-----------------------|
| Age, year                     | 64.97 ± 13.20            | 68.51 ± 10.35              | 0.192                 |
| Male, n (%)                   | 94 (54)                  | 7 (26.9)                   | 0.01*                 |
| Diabetes, n (%)               | 96 (55.2)                | 15 (57.7)                  | 0.809                 |
| Liver cirrhosis, n (%)        | 4 (2.3)                  | 4 (15.4)                   | 0.002*                |
| Dyslipidemia, n (%)           | 67 (38.5)                | 12 (46.2)                  | 0.457                 |
| Cardiovascular disease, n (%) | 64 (36.8)                | 3 (11.5)                   | 0.011*                |
| Immunosuppressant, n (%)      | 9 (5.2)                  | 0 (0)                      | 0.609                 |
| RAAS blockade, n (%)          | 75 (43.1)                | 12 (46.2)                  | 0.770                 |
| β-blocker, n (%)              | 73 (42.0)                | 7 (26.9)                   | 0.144                 |
| Statin, n (%)                 | 62 (35.6)                | 11 (42.3)                  | 0.510                 |
| Anti-S1 antibody (EU/mL)      | 2.28 (1.99-3.13)         | 3.89 (2.24-9.07)           | 0.001* <sup>\$</sup>  |
| Anti-RBD antibody (EU/mL)     | 2.14 (1.92-2.64)         | 3.16 (2.14-6.84)           | <0.001* <sup>\$</sup> |
| Hemoglobin (g/dL)             | 10.08 ± 1.18             | 9.95 ± 1.01                | 0.611                 |
| WBC (1000/μL)                 | 6.05 (4.90-7.63)         | 5.55 (4.63-6.80)           | 0.259 <sup>\$</sup>   |
| Platelet (1000/μL)            | 192.76 ± 70.27           | 178.65 ± 44.93             | 0.322                 |
| Albumin (g/dL)                | 4.027 ± 0.37             | 4.095 ± 0.40               | 0.388                 |
| Cholesterol (mg/dL)           | 154.44 ± 36.53           | 157.38 ± 30.84             | 0.697                 |
| Triglyceride (mg/dL)          | 116.50 (79.25-177.50)    | 108.00 (71.75-149.50)      | 0.532 <sup>\$</sup>   |
| AST (U/L)                     | 17 (13-21)               | 16.5 (14.0-21.5)           | 0.812 <sup>\$</sup>   |
| ALT (U/L)                     | 14 (10-19)               | 13.00 (10.75-17.25)        | 0.717 <sup>\$</sup>   |
| Alk-P (U/L)                   | 92.0(71.0-138.5)         | 97.50 (81.75-140.25)       | 0.316 <sup>\$</sup>   |
| Total bilirubin (mg/dL)       | 0.4 (0.3-0.4)            | 0.40 (0.30-0.43)           | 0.554 <sup>\$</sup>   |
| Bun (mg/dL)                   | 69.59 ± 21.49            | 71.16 ± 18.71              | 0.565                 |
| Creatinine (mg/dL)            | 9.66 ± 2.56              | 9.49 ± 2.10                | 0.748                 |
| Uric acid (mg/dL)             | 6.26 ± 1.92              | 5.92 ± 1.96                | 0.398                 |
| Na (meq/L)                    | 138.12 ± 3.11            | 138.04 ± 3.53              | 0.902                 |
| K (meq/L)                     | 4.74 ± 1.79              | 4.95 ± 0.77                | 0.208                 |
| Ca (mg/dL)                    | 9.40 ± 0.83              | 9.40 ± 0.76                | 0.997                 |
| P (mg/dL)                     | 5.28 ± 1.60              | 5.68 ± 1.34                | 0.231                 |
| C-reactive protein            | 4.35 (1.40-10.03)        | 3.50 (1.13-6.73)           | 0.282 <sup>\$</sup>   |
| Urea reduction rate           | 76 (71-79)               | 77.50 (73.00-81.25)        | 0.055 <sup>\$</sup>   |
| Kt/V (Daugirdes)              | 1.64 ± 0.34              | 1.76 ± 0.26                | 0.079                 |
| nPCR (g/kg/day)               | 1.09 ± 0.52              | 1.09 ± 0.23                | 0.991                 |
| TACurea                       | 41.46 ± 13.44            | 41.63 ± 11.37              | 0.952                 |
| Iron (μg/dL)                  | 65.00 (50.25-89.75)      | 74.00 (58.75-95.25)        | 0.238 <sup>\$</sup>   |
| Ferritin (ng/mL)              | 417.00 (221.75-681.25)   | 364.50 (221.75-584.00)     | 0.252 <sup>\$</sup>   |
| TSAT (%)                      | 34.13 ± 14.30            | 33.31 ± 10.93              | 0.780                 |
| Cardiothoracic ratio          | 0.52 ± 0.07              | 0.52 ± 0.07                | 0.928                 |
| Ca × P product                | 49.87 ± 16.89            | 53.32 ± 12.70              | 0.319                 |

Notes: Data are presented as mean ± standard deviation or median (interquartile range). Abbreviations: WBC, white blood cell count; AST, aspartate transaminase; ALT, alanine transaminase; Alk-P, alkaline phosphatase; Bun, blood urea nitrogen; Kt/V, A mathematical formula representing a dose of dialysis;

nPCR, normalized protein catabolic rate; TACurea, time average urea concentration; TSAT, transferrin saturation. \*: statistically significant; <sup>s</sup>: Nonparametric, independent-Sample Mann-Whitney U test.

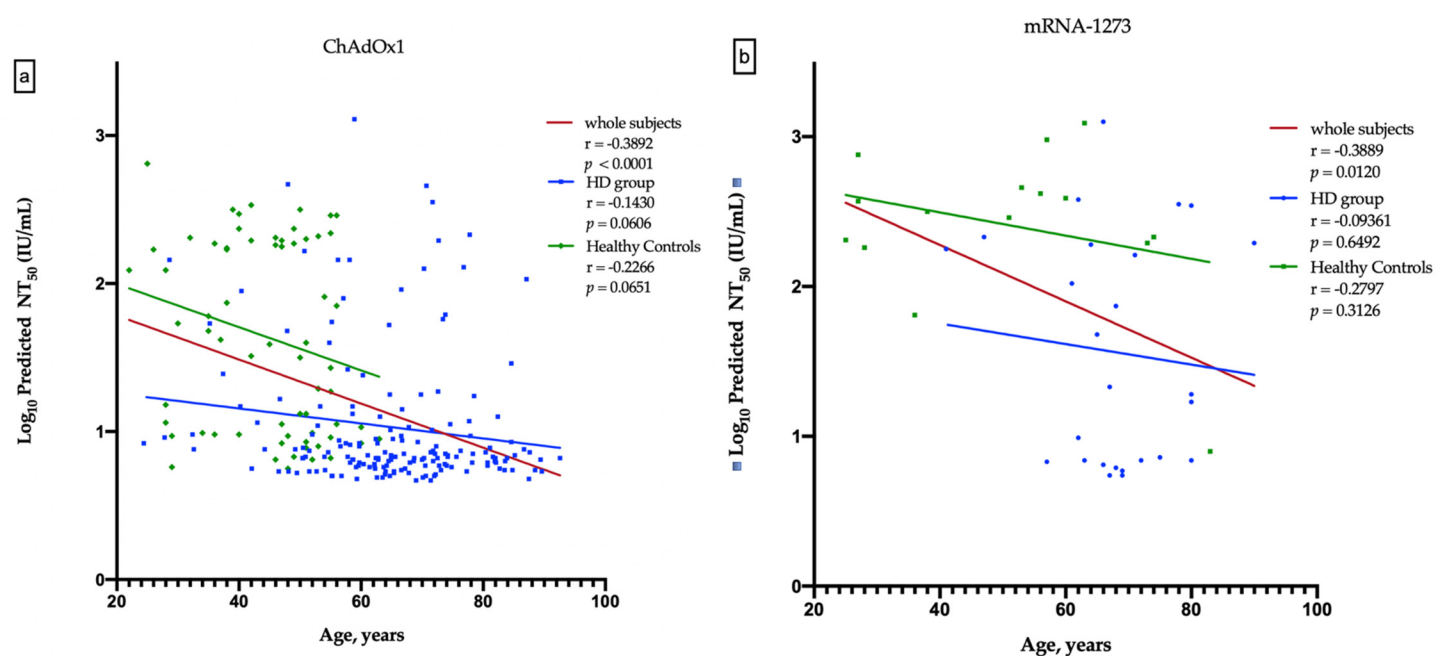

**Figure S1.** Correlation between the age and predicted SARS-CoV-2 50% neutralization titer ( $\text{NT}_{50}$ ) in ChAdOx1 group (Panel a) and mRNA-1273 group (Panel b).
